# Supplementary material
Source: PubMed Central journal article supplement (PMC2890474)
Supplement: 0909112107_pnas.200909112SI.pdf [file 0909112107_pnas.200909112SI.pdf]

# Supporting Information

Liu et al. 10.1073/pnas.0909112107

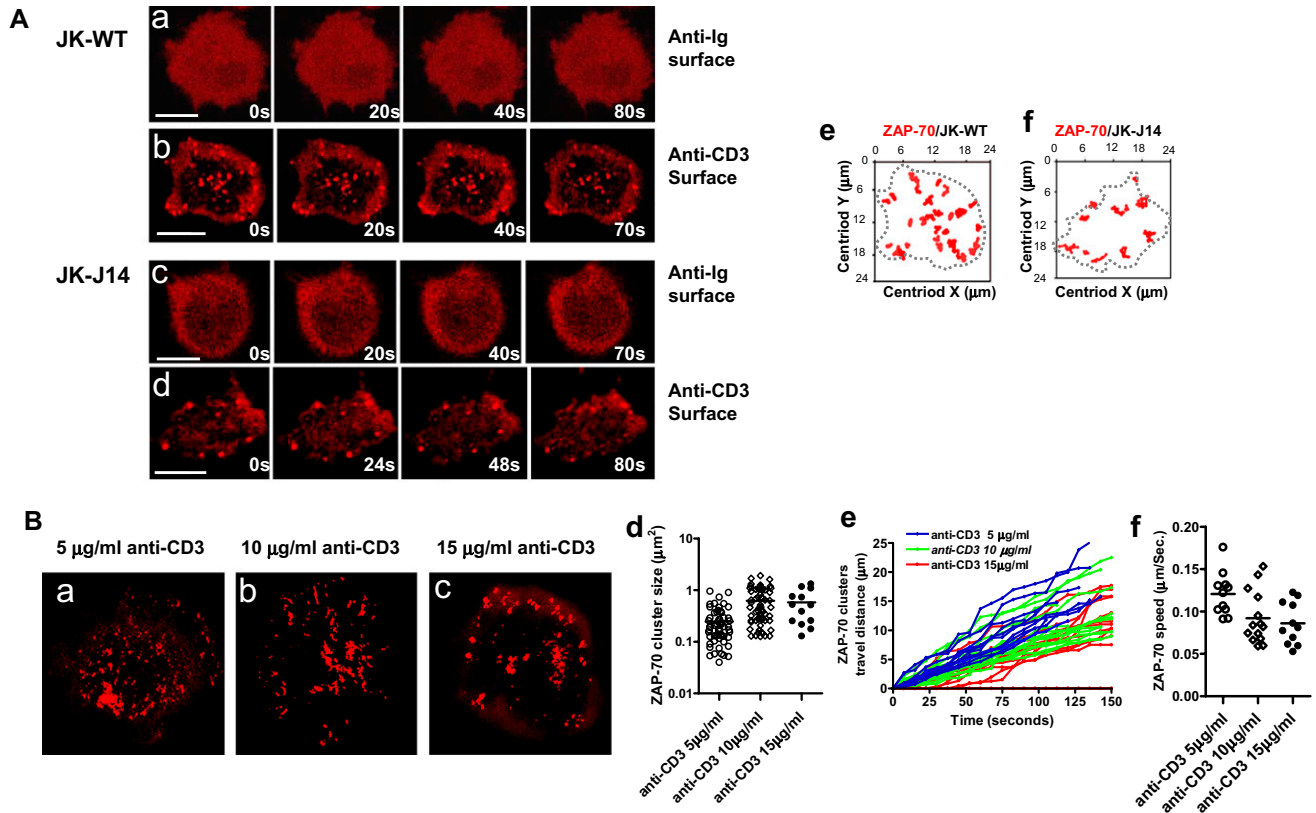

**Fig. S1.** (A) Time-lapse confocal images of ZAP-70-mRFP cluster formation and distribution at the interface of transfected Jurkat WT or J14 cells and anti-CD3-coated slides over a time course about 80 s. Jurkat WT cells expressing ZAP-70-mRFP on anti-CD3-coated slides (b) or on control anti-Ig-coated slides (a); SLP-76 deficient J14 cells expressing ZAP-70-mRFP on anti-CD3-coated slides (d) or on control anti-Ig-coated slides (c). The movement of ZAP-70 individual cluster expressed in Jurkat WT cells (e) or J14 cells (f) over the time course was tracked. The dotted line indicates boundary of T cell/coverlip interface. (Scale bars, 10  $\mu\text{m}$ .) (B) Titration of anti-CD3 signaling on ZAP-70 microcluster distribution, size and motility. Jurkat J14 cells were cotransfected with ZAP-70-mCFP and SLP-76-EYFP whereas images of microclusters were sequentially acquired in time lapse at the interface between cells and antigenic surface with a Zeiss LSM 510 confocal microscopy at 458 nm for mCFP and 514 nm for EYFP. (a–c) examples of images of ZAP-70-mCFP microclusters at the interface between T cells on a glass surface coated with different concentrations (5, 10, and 15  $\mu\text{g/ml}$ ) of human anti-CD3 OKT3. (d) histograms showing the size (d); travel distance with time (e) and speed of movement (f) of individual ZAP-70-mCFP clusters at different concentration of anti-CD3 stimulation.

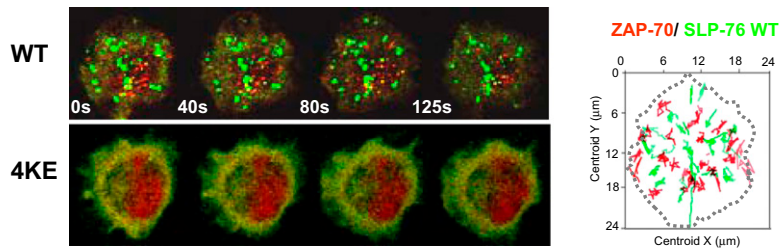

**Fig. S2.** Confocal microscopy of time-course of ZAP-70-mRFP clustering at the interface between transfected Jurkat T cells and antigenic coverslips. Jurkat J14 cells were coexpressed with ZAP-70-mRFP and SLP-76-EYFP and time course of ZAP-70 cluster formation and distribution was tracked over 0–125 s. ZAP-70-mRFP coexpressed with SLP-76-EYFP wt (*Upper Left*) or coexpressed with SLP-76-EYFP 4KE mutant (*Lower Left*). The movement of ZAP-70 and SLP-76 WT clusters in the cells over the time course was tracked (*Right*). ZAP-70-mRFP tracks are shown in shades of red and overlaid with tracks of SLP-76-EYFP in shades of green. The dark/black color regions indicate where the red and green was overlapped. Dotted line indicates boundary of T cell/coverslip interface.

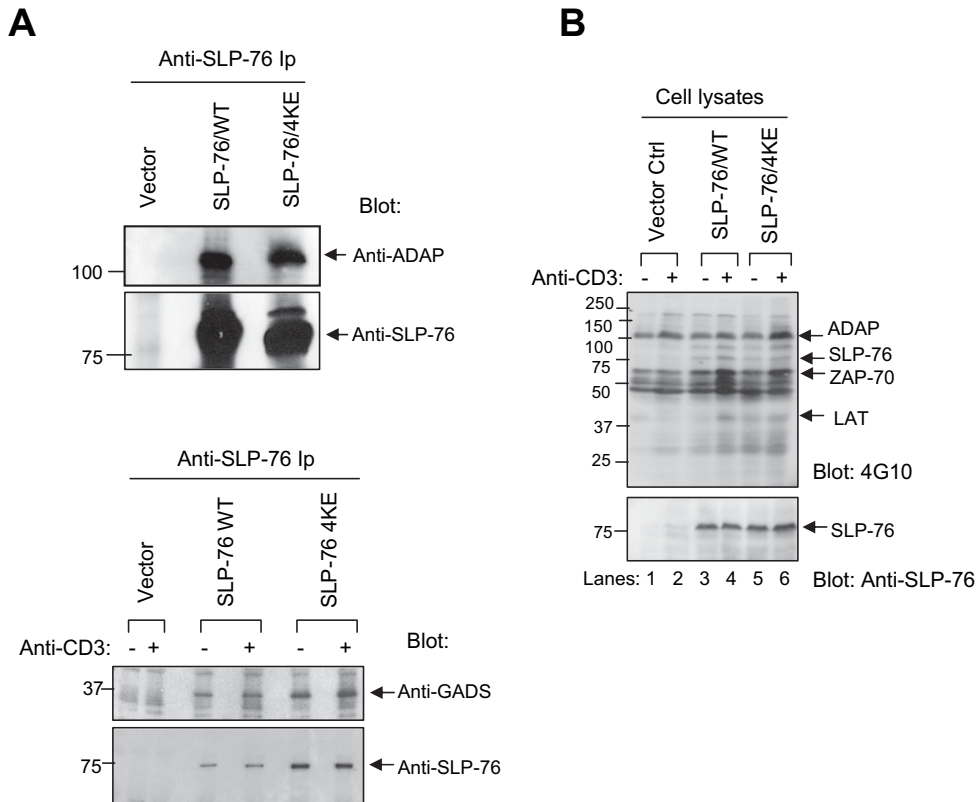

**Fig. S3.** (A) Interaction of SLP-76 WT and 4KE mutant with its binding partners ADAP and GADS. SLP-76 deficient J14 cells were transfected with either SR $\alpha$  empty vector or SR $\alpha$  HA tagged SLP-76 WT or 4KE mutant. Where indicated, the cells were left unstimulated or stimulated with 5  $\mu$ g/mL human anti-CD3 OKT3 with cross-linking for 10 min before immunoprecipitation with anti-SLP-76 monoclonal antibody. The SLP-76 associated endogenous ADAP or GADS was detected with anti-ADAP (*Upper*) or anti-GADS (*Lower*). Anti-SLP-76 blot included as a positive control in both panels. (B) Comparison of tyrosine phosphorylation in J14 Jurkat cells transfected SLP-76 vs. SLP-76 4KE mutant. SLP-76 deficient J14 cells were transfected with the control SR $\alpha$  empty vector (lanes 1 and 2), SR $\alpha$  HA tagged SLP-76 WT (lanes 3 and 4) or SR $\alpha$  HA tagged SLP-76 4KE mutant (lanes 5 and 6). Anti-CD3 was used to ligated T cells for 8 min followed by blotting with 4G10 (*Upper*) and subsequently with anti-SLP-76 (*Lower*). The bands corresponding to phosphorylated ADAP, SLP-76, ZAP-70, and LAT are indicated by arrows.

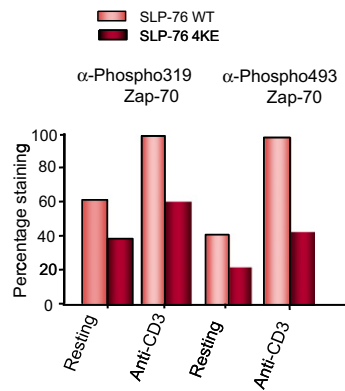

**Fig. S4.** FACS analysis of phosphorylation of ZAP-70 at 319 and 493 sites in Jurkat cells expressing SLP-76-EYFP WT or 4KE mutant. Jurkat J14 cells lacking SLP-76 were transfected with either WT SLP-76 or the 4KE mutant and subjected to anti-CD3 ligation for 8 min followed by intracellular staining with anti-phospho-ZAP-70 493 and 319. Histogram shows the relative percentage values of staining. The histogram showing the percentage of cells labeled with anti-pTy319 and pTy493.

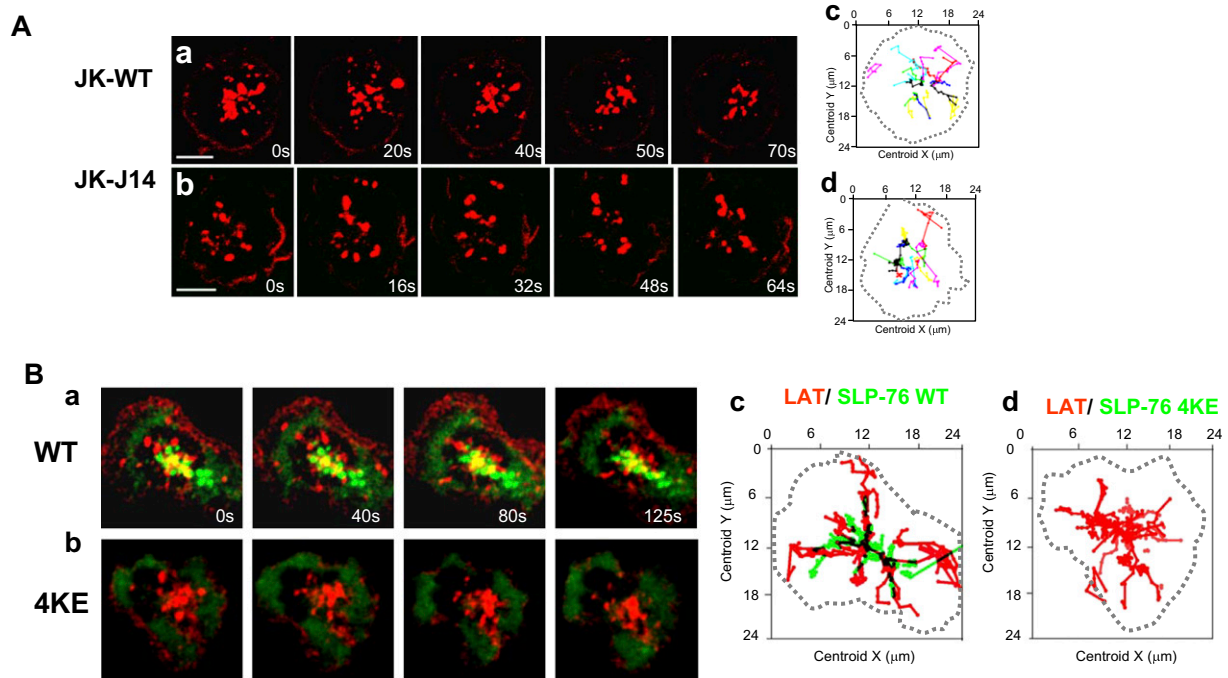

**Fig. S5.** (A) Time-lapse confocal images of LAT-mCherry cluster formation and distribution at the interface of transfected cells and anti-CD3-coated slides. LAT-mCherry microcluster formation in Jurkat WT cells over a time course of 70 s (a) or in SLP-76 deficient J14 cells over a time course of 64 s (b). The movement of LAT-mCherry individual cluster expressed in Jurkat WT cells (c) or J14 cells (d) over the time course was tracked. The dotted line indicates boundary of T cell/coverlip interface. (Scale bars, 8  $\mu$ m.) (B) Confocal microscopy of time-course of LAT-mCherry clustering at the interface between transfected cells and antigenic coverslips. LAT-mCherry and SLP-76-EYFP were coexpressed in Jurkat J14 cells followed by a time course of LAT cluster formation over 0–125 s. LAT-mCherry coexpressed with SLP-76-EYFP WT (a) or coexpressed with SLP-76-EYFP 4KE mutant (b). The movement of LAT and SLP-76 clusters was tracked in the cells over the time course. LAT-mCherry tracks are shown in shades of red and overlaid with tracks of SLP-76 in shades of green. The dark/black color regions indicate where the red and green was overlapped. Tracks of LAT-mCherry (red) and SLP-76-EYFP WT (green) (c); Tracks of LAT-mCherry (red) and SLP-76-EYFP 4KE (few green tracks) (d). Dotted line indicates boundary of T cell/cover-slip interface.

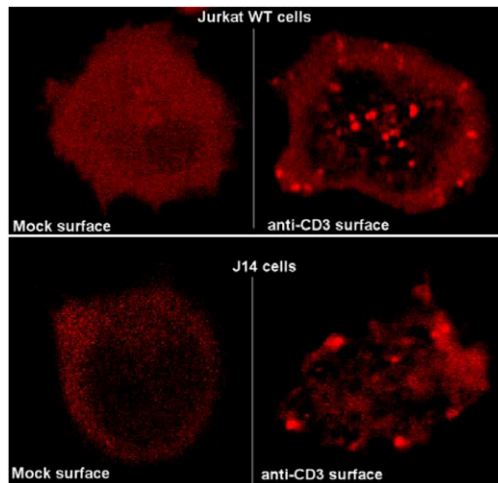

**Movie S1.** Time-lapse images of ZAP-70 clusters formation at the interface between ZAP-70-mRFP transfected Jurkat T cells and OKT3-coated coverslips or mock anti-Ig-treated coverslips (*Upper*), or between ZAP-70-mRFP-transfected SLP-76-deficient J14 cells and OKT3-coated coverslips or anti-Ig mock treated coverslips (*Lower*).

[Movie S1](#)

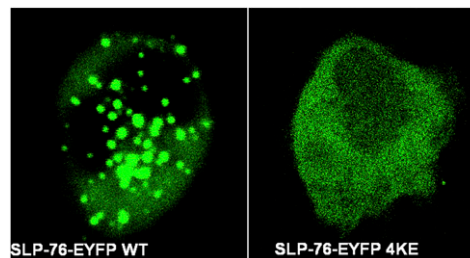

**Movie S2.** Time-lapse images of SLP-76 WT or SLP-76 4KE mutant cluster formation at the interface between SLP-76 WT-EYFP-transfected Jurkat T cells (*Left*) or SLP-76/4KE-EYFP-transfected Jurkat cells (*Right*) and OKT3-coated coverslips.

[Movie S2](#)

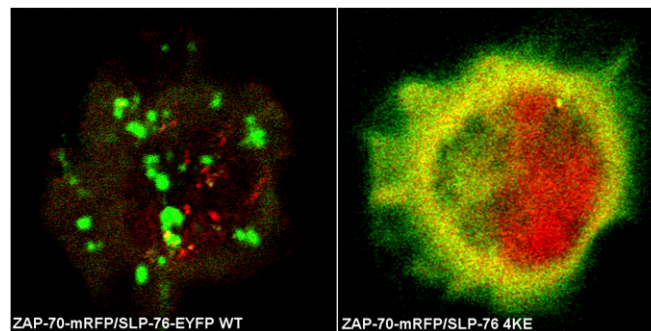

**Movie S3.** Time-lapse images of ZAP-70 cluster formation at the interface between transfected Jurkat J14 T cells and OKT3-coated coverslips. Jurkat J14 T cells were cotransfected with ZAP-70-mRFP (red) and SLP-76/WT-EYFP (green) (*Left*) or with ZAP-70-mRFP (red) and SLP-76/4KE-EYFP (green) (*Right*).

[Movie S3](#)

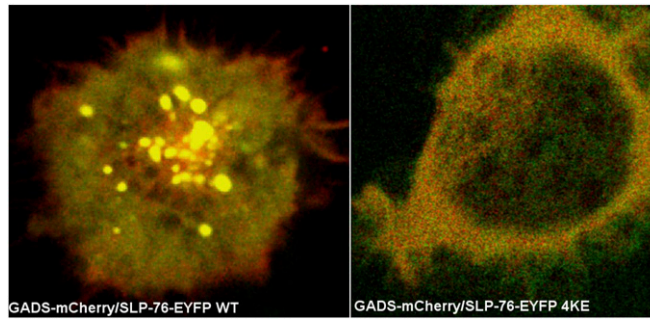

**Movie S4.** Time-lapse images of GADS cluster formation at the interface between transfected Jurkat T cells and OKT3-coated coverslips. Jurkat T cells were cotransfected with GADS-mCherry (red) and SLP-76/WT-EYFP (green) (*Left*) or with GADS-mCherry (red) and SLP-76/4KE-EYFP (green) (*Right*).

[Movie S4](#)

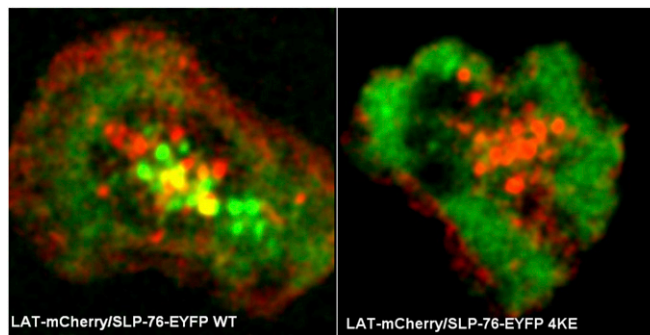

**Movie S5.** Time-lapse images of LAT clusters formation at the interface between transfected Jurkat J14 T cells and OKT3-coated coverslips. J14 T cells were cotransfected with LAT-mCherry (red) and SLP-76/WT-EYFP (green) (*Left*) or with LAT-mCherry (red) and SLP-76/4KE-EYFP (green) (*Right*).

[Movie S5](#)

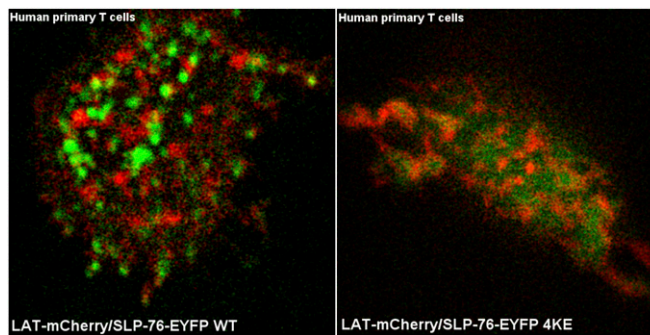

**Movie S6.** Time-lapse images of LAT clusters formation in at the interface between transfected human primary T cells and OKT3-coated coverslips. Human primary T cells were cotransfected with LAT-mCherry (red) and SLP-76/WT-EYFP (green) (*Left*) or with LAT-mCherry (red) and SLP-76/4KE-EYFP (green) (*Right*).

[Movie S6](#)
